# Supplementary material for: Salting-out effect on facilitated transport membranes for CO2 separation: From fluoride salt to polyoxometalates
Source: Royal Society of Chemistry journal article supplement (doi:10.1039/c2ra20882b), 2012-01-01

## Supporting Information

### Salting-out effect on facilitated transport membranes for CO<sub>2</sub> separation: from fluoride salt to polyoxometalates

Lizhi Zhang<sup>a,b</sup> and Rong Wang<sup>\*a,b</sup>

<sup>a</sup> School of Civil and Environmental Engineering, Nanyang Technological University, 50 Nanyang Avenue, Singapore 639798, Singapore.

<sup>b</sup> Singapore Membrane Technology Centre, Nanyang Technological University, 50 Nanyang Avenue, Singapore 639798, Singapore

**Figure S1.** Experimental set-up for gas permeation test.

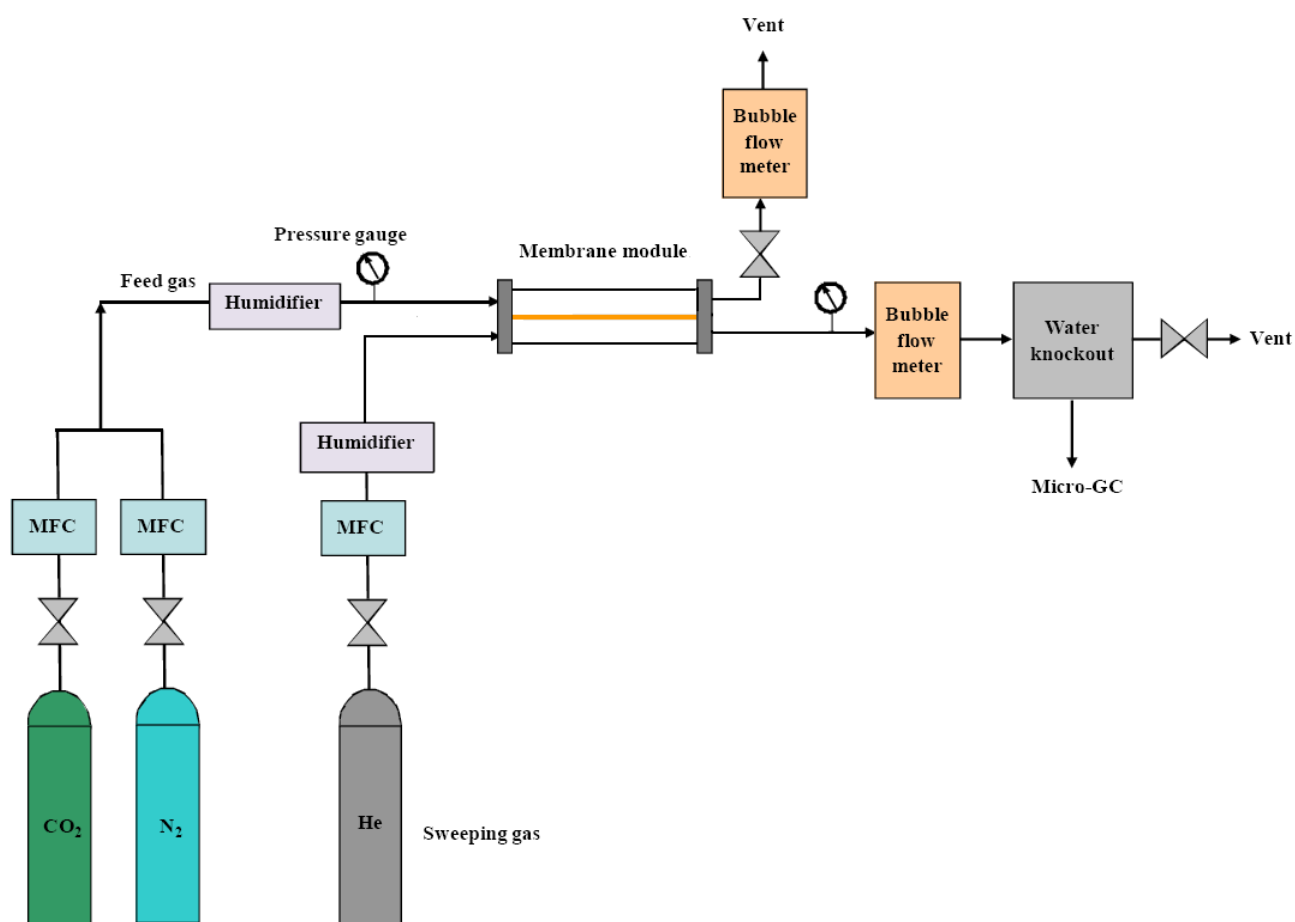

Supplement: c2ra20882b.pdf [file c2ra20882b.pdf]
